# Supplementary material
Source: MDPI journal article supplement (https://www.mdpi.com/2076-3417/12/4/1787)
Supplement: s1 [file s1 › applsci-1536799 -SI.pdf]

Supplementary Materials for Bensen-Boakes et al., The effect of cognitive behavioural therapy for insomnia (CBT-I) on subjective-objective sleep discrepancy in individuals with co-morbid insomnia and sleep apnoea: A randomized controlled trial.

**Contents:**

Table S1. Average SOSD ratio between groups and time ( $\pm 95\%$  confidence intervals).

Table S2a. Complete case analysis, average SOSD between groups and time (standard deviation).

Table S2b. ITT Linear Mixed Models results, average SOSD between groups and time ( $\pm 95\%$  confidence intervals).

Table S3. Correlations between stage-specific, AHI, arousal index and polysomnography sleep duration with SOSD parameters at baseline.

Table S4. Correlations between SOSD parameters and sociodemographic variables at baseline.

Table S5. Correlations between SOSD parameters and 7-day sleep diary variables at baseline.

Table S6. Correlations between SOSD parameters and questionnaire battery variables at baseline.

Table S7. Correlations between SOSD parameters and polysomnography variables at baseline.

Table S1. Average SOSD ratio between groups and time ( $\pm 95\%$  confidence intervals).

|                                        | Control         |                 | CBT-I           |                 |                        |                        |                        |
|----------------------------------------|-----------------|-----------------|-----------------|-----------------|------------------------|------------------------|------------------------|
|                                        | Baseline        | 6-weeks         | Baseline        | 6-weeks         | Main group effect      | Main time effect       | Interaction effect     |
| Total Sleep Time<br>SOSD (ratio)       | 0.13<br>(0.09)  | 0.07<br>(0.09)  | 0.09<br>(0.09)  | -0.01<br>(0.09) | $F = 7.86$<br>$P .203$ | $F = 3.62$<br>$P .059$ | $F = 0.30$<br>$P .588$ |
| Sleep Onset Latency<br>SOSD (ratio)    | -4.79<br>(1.41) | -3.29<br>(1.44) | -2.10<br>(1.48) | -1.77<br>(1.46) | $F = 1.28$<br>$P .260$ | $F = 2.09$<br>$P .150$ | $F = 0.73$<br>$P .395$ |
| Wake After Sleep<br>Onset SOSD (ratio) | -0.28<br>(0.22) | -0.14<br>(0.23) | -0.11<br>(0.23) | -0.04<br>(0.23) | $F = 1.03$<br>$P .311$ | $F = 0.49$<br>$P .484$ | $F = 0.27$<br>$P .604$ |
| Sleep Efficiency<br>SOSD (ratio)       | 0.13<br>(0.06)  | 0.07<br>(0.06)  | 0.11<br>(0.06)  | 0.01<br>(0.06)  | $F = 1.92$<br>$P .168$ | $F = 6.33$<br>$P .013$ | $F = 0.12$<br>$P .726$ |

Table S2a. Complete case analysis, average SOSD between groups and time (standard deviation).

|                             | Control      |              | CBT-I        |              |                           |                           |                          |
|-----------------------------|--------------|--------------|--------------|--------------|---------------------------|---------------------------|--------------------------|
|                             | Baseline     | 6-weeks      | Baseline     | 6-weeks      | Main group effect         | Main time effect          | Interaction effect       |
| Total Sleep Time SOSD       | -60.0 (85.7) | -32.0 (83.8) | -45.3 (100)  | -11.0 (76)   | $F = 2.24$<br>$P = .137$  | $F = 11.93$<br>$P = .001$ | $F = .119$<br>$P = .731$ |
| Sleep Onset Latency SOSD    | 37 (83.2)    | 21.7 (45.21) | 32.6 (88.7)  | 10.8 (34.1)  | $F = .776$<br>$P = .380$  | $F = 5.80$<br>$P = .017$  | $F = .183$<br>$P = .669$ |
| Wake After Sleep Onset SOSD | 3.5 (69.6)   | 2.1 (84.3)   | -15.2 (83.3) | -10.7 (51.1) | $F = 2.123$<br>$P = .147$ | $F = .049$<br>$P = .825$  | $F = .195$<br>$P = .659$ |
| Sleep Efficiency SOSD       | -10.4 (17.6) | -6.4 (17.7)  | -8.9 (19.0)  | -1.8 (15.2)  | $F = 1.532$<br>$P = .218$ | $F = 11.11$<br>$P = .001$ | $F = .82$<br>$P = .367$  |

Table S2b. ITT Linear Mixed Models results, average SOSD between groups and time ( $\pm 95\%$  confidence intervals).

|                             | Control      |              | CBT-I        |              |                            |                            |                          |
|-----------------------------|--------------|--------------|--------------|--------------|----------------------------|----------------------------|--------------------------|
|                             | Baseline     | 6-weeks      | Baseline     | 6-weeks      | Main group effect          | Main time effect           | Interaction effect       |
| Total Sleep Time SOSD       | -58.3 (20.3) | -31.5 (20.7) | -45.2 (20.7) | -11.3 (21.0) | $F = 1.979$<br>$P = .162$  | $F = 11.433$<br>$P = .001$ | $F = .156$<br>$P = .693$ |
| Sleep Onset Latency SOSD    | 38.0 (15.7)  | 21.9 (16.0)  | 30.7 (16.1)  | 10.4 (16.3)  | $F = 1.197$<br>$P = .276$  | $F = 5.692$<br>$P = .018$  | $F = .073$<br>$P = .787$ |
| Wake After Sleep Onset SOSD | 1.9 (17.1)   | 1.3 (17.4)   | -10.4 (17.5) | -8.3 (17.6)  | $F = 1.075$<br>$P = .302$  | $F = .014$<br>$P = .906$   | $F = .043$<br>$P = .835$ |
| Sleep Efficiency SOSD       | -10.4 (4.1)  | -6.3 (4.1)   | -8.9 (4.1)   | -1.8 (4.2)   | $F = 1.3572$<br>$P = .246$ | $F = 10.94$<br>$P = .001$  | $F = .89$<br>$P = .347$  |

Table S3. Correlations between stage-specific, AHI, arousal index and polysomnography sleep duration with SOSD parameters at baseline.

|                   | Total sleep time SOSD     | Sleep onset latency SOSD  | Wake after sleep onset SOSD | Sleep efficiency SOSD     |
|-------------------|---------------------------|---------------------------|-----------------------------|---------------------------|
| N1 (minutes)      | $r = -.02$<br>$P = .818$  | $r = -.049$<br>$P = .567$ | $r = -.149$<br>$P = .08$    | $r = .062$<br>$P = .464$  |
| N1 (percent)      | $r = .192$<br>$P = .023$  | $r = -.106$<br>$P = .212$ | $r = -.249$<br>$P = .003$   | $r = .226$<br>$P = .007$  |
| N2 (minutes)      | $r = -.362$<br>$P < .001$ | $r = .025$<br>$P = .766$  | $r = .229$<br>$P = .006$    | $r = -.304$<br>$P < .001$ |
| N2 (percent)      | $r = -.11$<br>$P = .193$  | $r = .01$<br>$P = .908$   | $r = .184$<br>$P = .03$     | $r = -.183$<br>$P = .03$  |
| N3 (minutes)      | $r = -.109$<br>$P = .2$   | $r = .04$<br>$P = .639$   | $r = .144$<br>$P = .09$     | $r = -.059$<br>$P = .489$ |
| N3 (percent)      | $r = .001$<br>$P = .986$  | $r = .059$<br>$P = .488$  | $r = .133$<br>$P = .119$    | $r = -.011$<br>$P = .895$ |
| REM (minutes)     | $r = -.295$<br>$P < .001$ | $r = .103$<br>$P = .225$  | $r = .082$<br>$P = .334$    | $r = -.209$<br>$P = .013$ |
| REM (percent)     | $r = -.162$<br>$P = .055$ | $r = .113$<br>$P = .184$  | $r = .036$<br>$P = .669$    | $r = -.13$<br>$P = .124$  |
| AHI N1            | $r = .065$<br>$P = .444$  | $r = .064$<br>$P = .452$  | $r = -.195$<br>$P = .021$   | $r = .061$<br>$P = .473$  |
| Arousal index N1  | $r = .093$<br>$P = .274$  | $r = -.038$<br>$P = .659$ | $r = -.125$<br>$P = .141$   | $r = .102$<br>$P = .232$  |
| AHI N2            | $r = -.007$<br>$P = .937$ | $r = .190$<br>$P = .025$  | $r = -.099$<br>$P = .244$   | $r = -.066$<br>$P = .436$ |
| Arousal index N2  | $r = -.001$<br>$P = .991$ | $r = .023$<br>$P = .79$   | $r = -.082$<br>$P = .339$   | $r = -.008$<br>$P = .925$ |
| AHI N3            | $r = -.079$<br>$P = .365$ | $r = -.126$<br>$P = .151$ | $r = .162$<br>$P = .064$    | $r = -.093$<br>$P = .291$ |
| Arousal index N3  | $r = -.098$<br>$P = .264$ | $r = -.157$<br>$P = .074$ | $r = .1$<br>$P = .257$      | $r = -.077$<br>$P = .383$ |
| AHI REM           | $r = .198$<br>$P = .022$  | $r = -.127$<br>$P = .145$ | $r = -.076$<br>$P = .386$   | $r = .145$<br>$P = .093$  |
| Arousal index REM | $r = .148$<br>$P = .086$  | $r = -.118$<br>$P = .174$ | $r = -.088$<br>$P = .31$    | $r = .135$<br>$P = .118$  |

Table S4. Correlations between SOSD parameters and sociodemographic variables at baseline.

|     | Total sleep time<br>SOSD  | Sleep onset<br>latency SOSD | Wake after<br>sleep onset<br>SOSD | Sleep efficiency<br>SOSD  |
|-----|---------------------------|-----------------------------|-----------------------------------|---------------------------|
| Age | $r = -.009$<br>$P = .915$ | $r = .079$<br>$P = .352$    | $r = -.167$<br>$P = .048$         | $r = .073$<br>$P = .39$   |
| BMI | $r = .055$<br>$P = .526$  | $r = -.088$<br>$P = .308$   | $r = .047$<br>$P = .584$          | $r = .04$<br>$P = .646$   |
| Sex | $r = -.043$<br>$P = .614$ | $r = .004$<br>$P = .961$    | $r = .02$<br>$P = .811$           | $r = -.019$<br>$P = .823$ |

Table S5. Correlations between SOSD parameters and 7-day sleep diary variables at baseline.

|                                          | Total sleep time<br>SOSD  | Sleep onset<br>latency SOSD | Wake after<br>sleep onset<br>SOSD | Sleep efficiency<br>SOSD  |
|------------------------------------------|---------------------------|-----------------------------|-----------------------------------|---------------------------|
| 7-day diary total<br>sleep time          | $r = .215$<br>$P = .01$   | $r = .164$<br>$P = .053$    | $r = -.221$<br>$P = .009$         | $r = .12$<br>$P = .157$   |
| 7-day diary time<br>in bed               | $r = .053$<br>$P = .529$  | $r = .167$<br>$P = .048$    | $r = -.166$<br>$P = .05$          | $r = -.028$<br>$P = .741$ |
| 7-day diary<br>sleep onset<br>latency    | $r = -.057$<br>$P = .504$ | $r = .08$<br>$P = .348$     | $r = -.12$<br>$P = .159$          | $r = -.016$<br>$P = .849$ |
| 7-day diary<br>wake after sleep<br>onset | $r = -.182$<br>$P = .03$  | $r = -.043$<br>$P = .611$   | $r = .230$<br>$P = .006$          | $r = -.178$<br>$P = .035$ |
| 7-day diary<br>number of<br>awakenings   | $r = -.037$<br>$P = .665$ | $r = -.084$<br>$P = .323$   | $r = .055$<br>$P = .519$          | $r = -.059$<br>$P = .485$ |
| 7-day diary<br>sleep efficiency          | $r = .212$<br>$P = .012$  | $r = .031$<br>$P = .719$    | $r = -.132$<br>$P = .119$         | $r = .169$<br>$P = .045$  |

Table S6. Correlations between SOSD parameters and questionnaire battery variables at baseline.

|                                                                | Total sleep time<br>SOSD  | Sleep onset<br>latency SOSD | Wake after<br>sleep onset<br>SOSD | Sleep efficiency<br>SOSD  |
|----------------------------------------------------------------|---------------------------|-----------------------------|-----------------------------------|---------------------------|
| Insomnia<br>Severity Index                                     | $r = -.057$<br>$P = .502$ | $r = .105$<br>$P = .216$    | $r = .01$<br>$P = .907$           | $r = -.066$<br>$P = .44$  |
| Epworth<br>Sleepiness<br>Scale                                 | $r = -.061$<br>$P = .472$ | $r = -.06$<br>$P = .484$    | $r = .093$<br>$P = .273$          | $r = -.02$<br>$P = .814$  |
| Flinders Fatigue<br>Scale                                      | $r = .041$<br>$P = .63$   | $r = -.041$<br>$P = .631$   | $r = .036$<br>$P = .671$          | $r = .006$<br>$P = .941$  |
| Dysfunctional<br>Beliefs and<br>Attitudes about<br>Sleep Scale | $r = -.028$<br>$P = .746$ | $r = .074$<br>$P = .387$    | $r = -.139$<br>$P = .1$           | $r = .032$<br>$P = .71$   |
| Daytime<br>Feelings and<br>Functioning<br>Scale                | $r = .069$<br>$P = .419$  | $r = -.026$<br>$P = .76$    | $r = .016$<br>$P = .849$          | $r = .034$<br>$P = .69$   |
| Depression                                                     | $r = .009$<br>$P = .918$  | $r = -.008$<br>$P = .924$   | $r = -.016$<br>$P = .854$         | $r = -.034$<br>$P = .692$ |
| Anxiety                                                        | $r = -.004$<br>$P = .962$ | $r = -.045$<br>$P = .597$   | $r = .001$<br>$P = .988$          | $r = .024$<br>$P = .774$  |
| Stress                                                         | $r = -.062$<br>$P = .467$ | $r = -.034$<br>$P = .688$   | $r = .101$<br>$P = .235$          | $r = -.044$<br>$P = .606$ |

Table S7. Correlations between SOSD parameters and polysomnography variables at baseline.

|                        | Total sleep time SOSD       | Sleep onset latency SOSD    | Wake after sleep onset SOSD | Sleep efficiency SOSD       |
|------------------------|-----------------------------|-----------------------------|-----------------------------|-----------------------------|
| Total sleep time       | $r = -.413$<br>$P = < .001$ | $r = .04$<br>$P = .638$     | $r = .158$<br>$P = .063$    | $r = -.270$<br>$P = .001$   |
| Sleep efficiency       | $r = -.293$<br>$P = < .001$ | $r = .094$<br>$P = .27$     | $r = .408$<br>$P = < .001$  | $r = -.367$<br>$P = < .001$ |
| Wake after sleep onset | $r = .142$<br>$P = .092$    | $r = .109$<br>$P = .199$    | $r = -.493$<br>$P = < .001$ | $r = .235$<br>$P = .005$    |
| Sleep onset latency    | $r = .095$<br>$P = .263$    | $r = -.399$<br>$P = < .001$ | $r = -.05$<br>$P = .556$    | $r = .211$<br>$P = .012$    |
| Time in bed            | $r = -.245$<br>$P = .003$   | $r = -.114$<br>$P = .181$   | $r = -.183$<br>$P = .03$    | $r = .009$<br>$P = .914$    |
| AHI                    | $r = .084$<br>$P = .322$    | $r = .053$<br>$P = .532$    | $r = -.161$<br>$P = .058$   | $r = .055$<br>$P = .516$    |
| Arousal index          | $r = .085$<br>$P = .314$    | $r = -.019$<br>$P = .826$   | $r = -.182$<br>$P = .032$   | $r = .102$<br>$P = .228$    |
